# Supplementary material for: A Comparative Study of Molecular Structure, pKa, Lipophilicity, Solubility, Absorption and Polar Surface Area of Some Antiplatelet Drugs
Source: Int J Mol Sci. 2016 Mar 19;17(3):388. doi: 10.3390/ijms17030388 (PMC4813244; doi:10.3390/ijms17030388)
Supplement: Supplementary file 1 [file ijms-17-00388-s001.pdf]

## Supplementary Materials: A Comparative Study of Molecular Structure, pKa, Lipophilicity, Solubility, Absorption and Polar Surface Area of Some Antiplatelet Drugs

Milan Remko, Anna Remková and Ria Broer

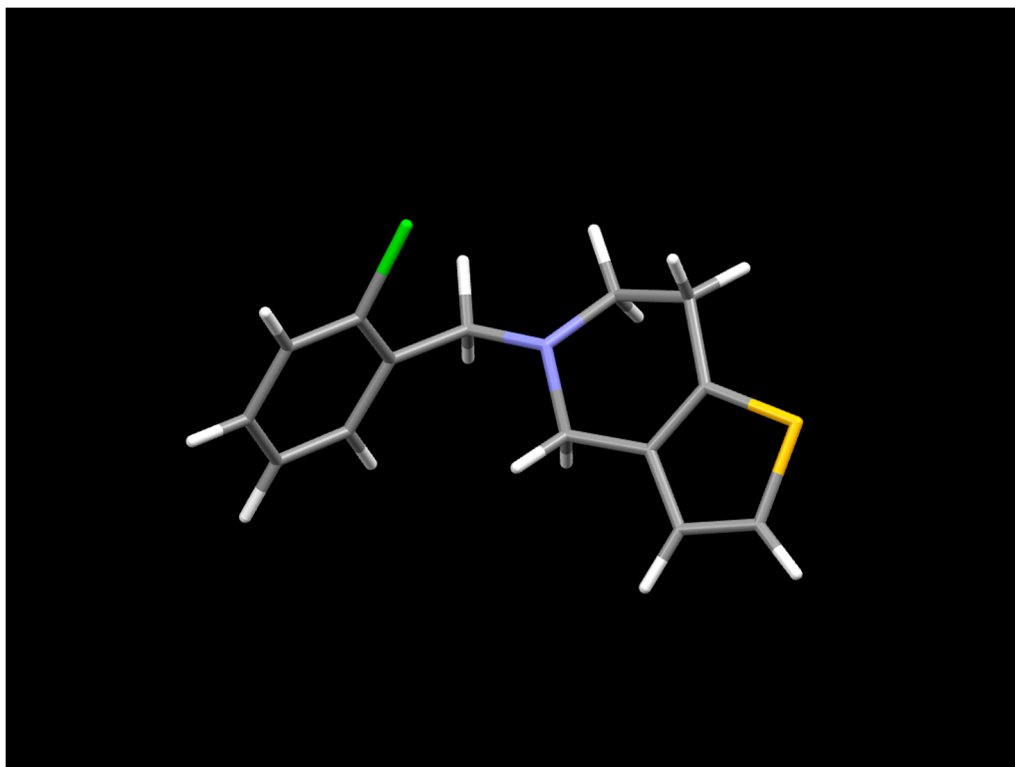

Overall shape of the ticlopidine computed at the Becke3LYP/6-311++G(d,p) level of theory.

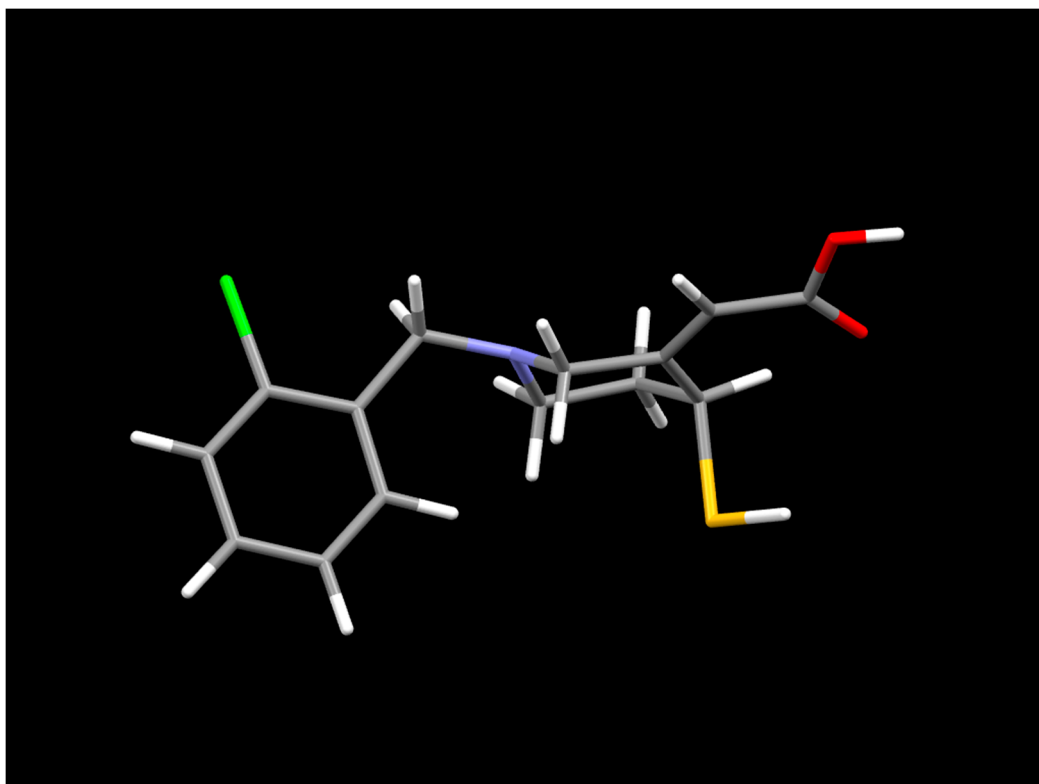

Overall shape of the ticlopidine metabolite computed at the Becke3LYP/6-311++G(d,p) level of theory.

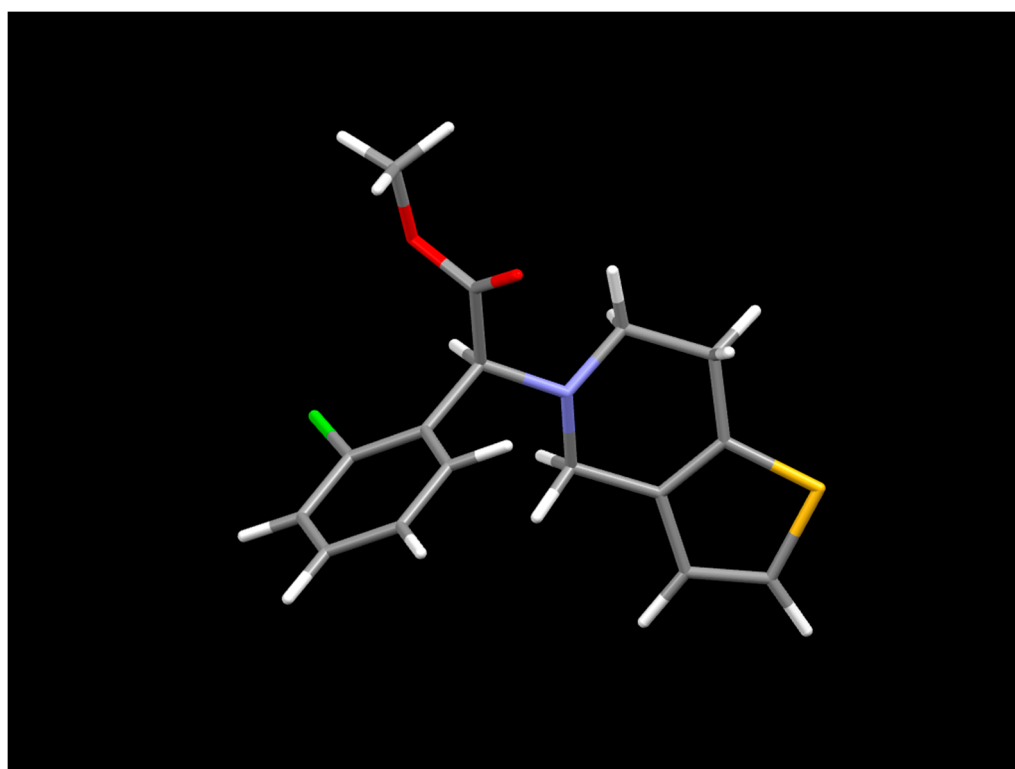

Overall shape of the clopidogrel computed at the Becke3LYP/6-311++G(d,p) level of theory.

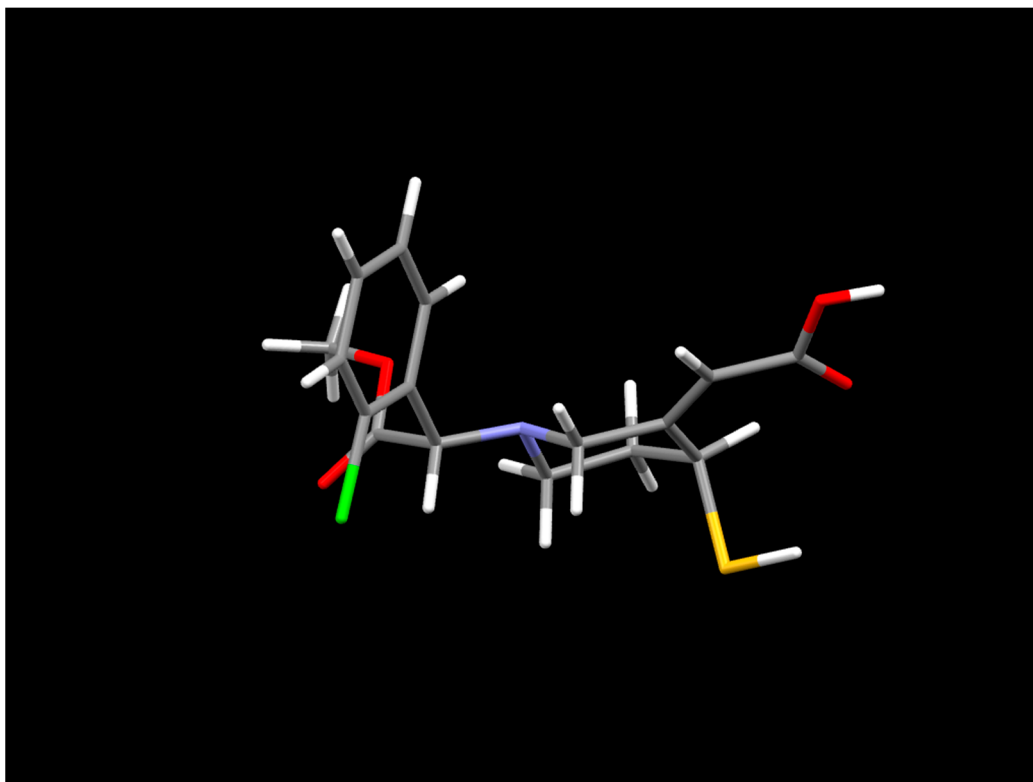

Overall shape of the clopidogrel metabolite computed at the Becke3LYP/6-311++G(d,p) level of theory.

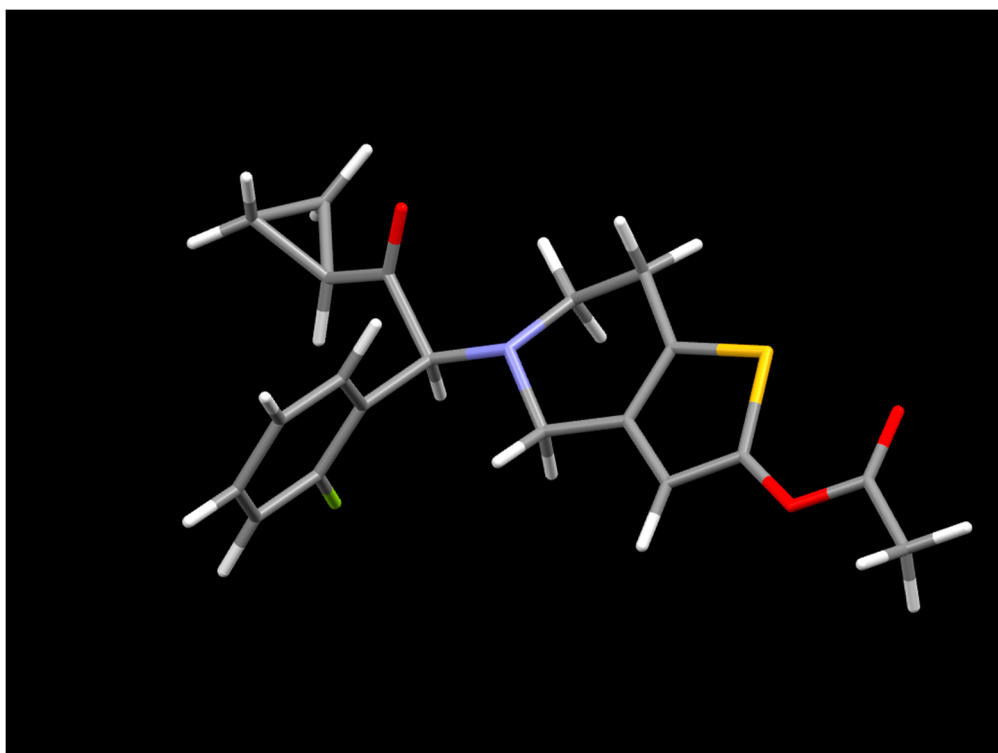

Overall shape of the prasugrel computed at the Becke3LYP/6-311++G(d,p) level of theory.

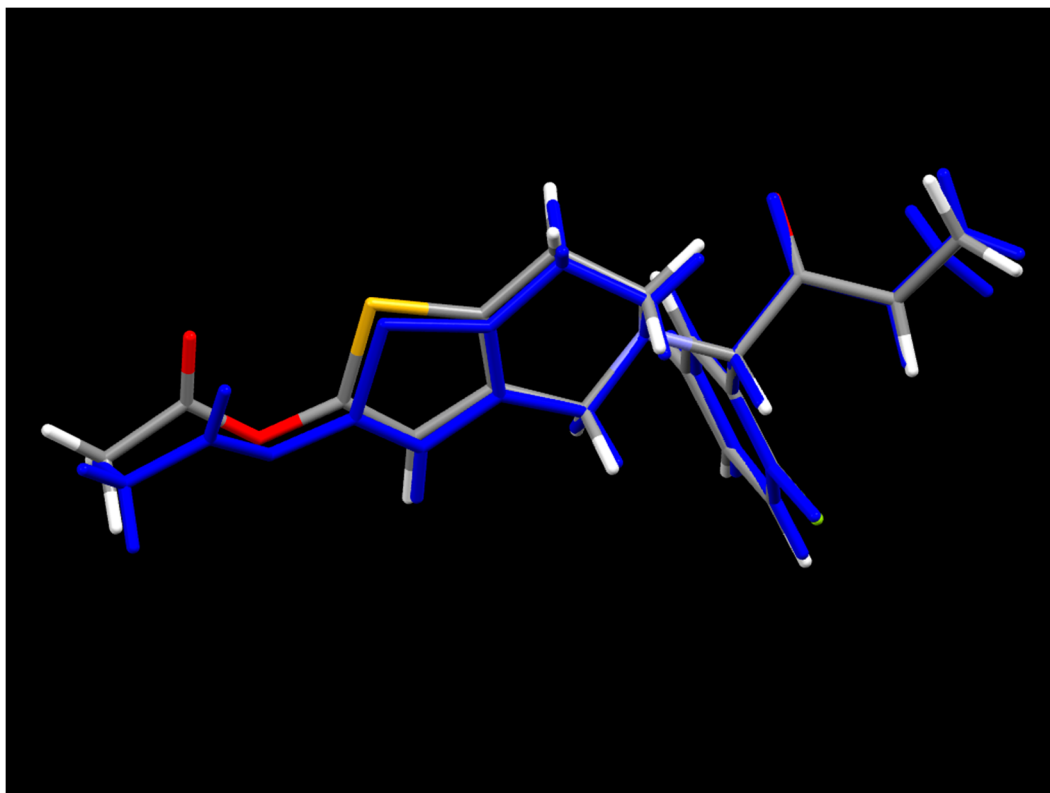

Molecular superimposition of the Becke3LYP-optimized molecular structure of prasugrel (color by connected atoms) and solid state prasugrel from [18] (blue).

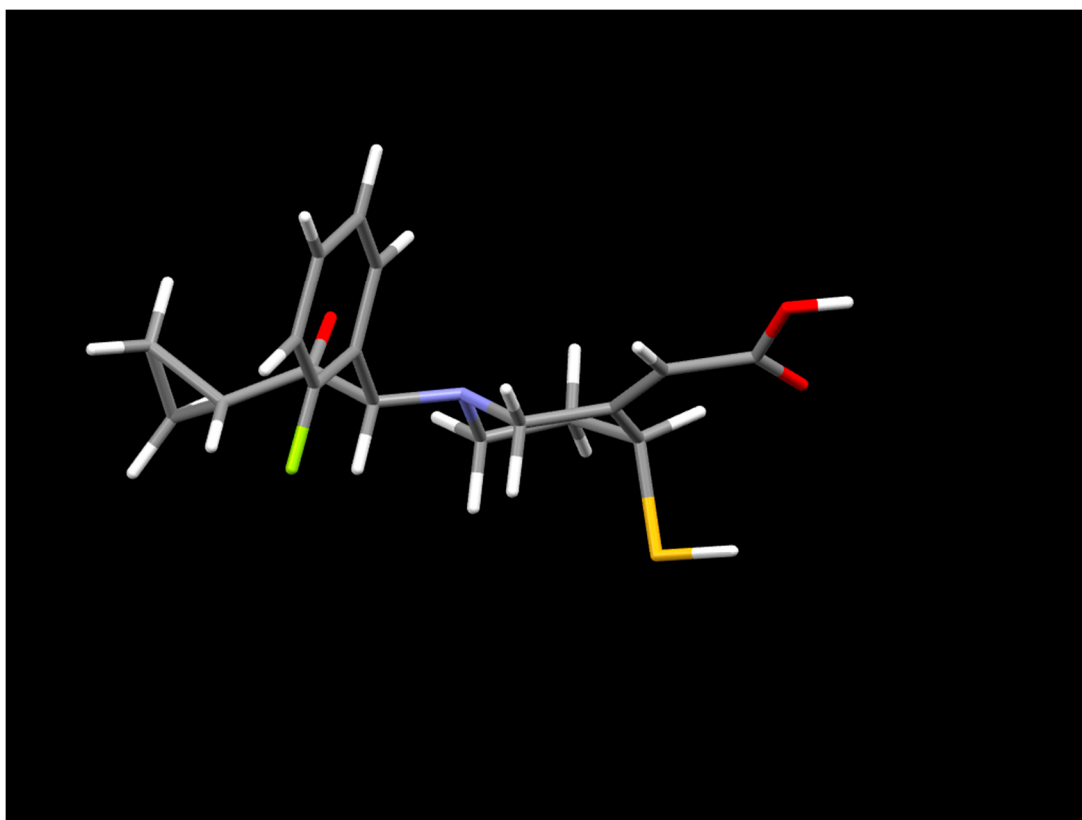

Overall shape of the prasugrel metabolite computed at the Becke3LYP/6-311++G(d,p) level of theory.

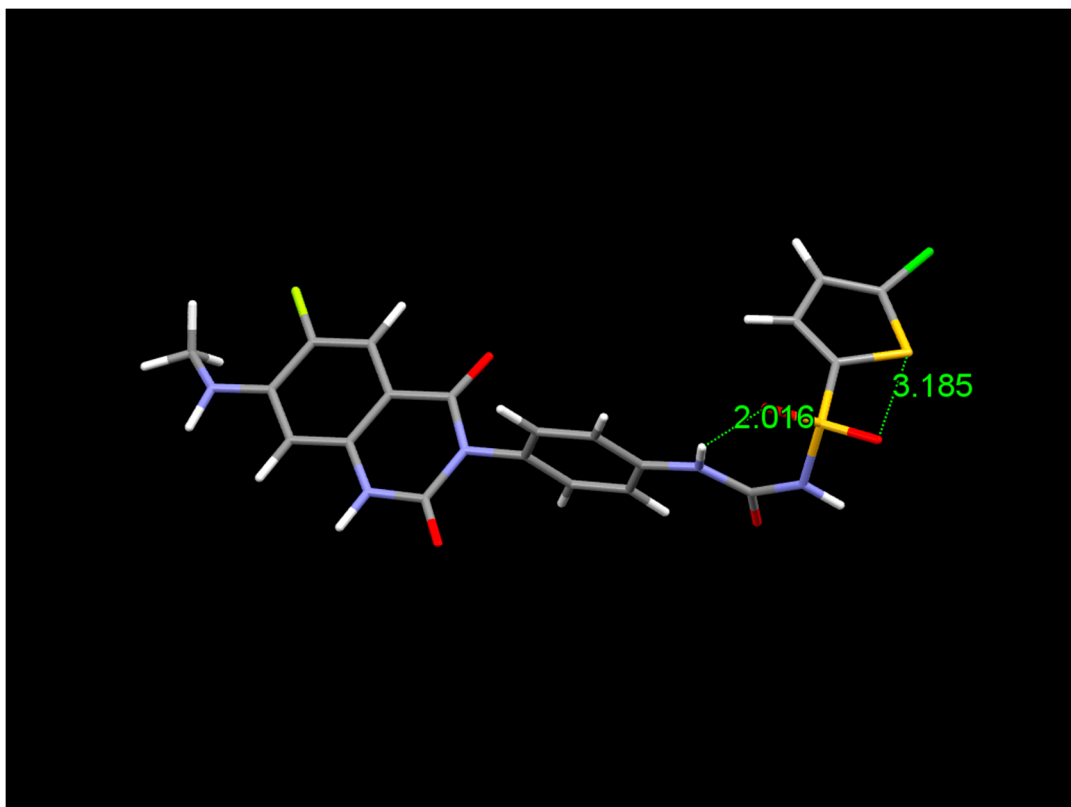

Overall shape of the elinogrel computed at the Becke3LYP/6-311++G(d,p) level of theory.

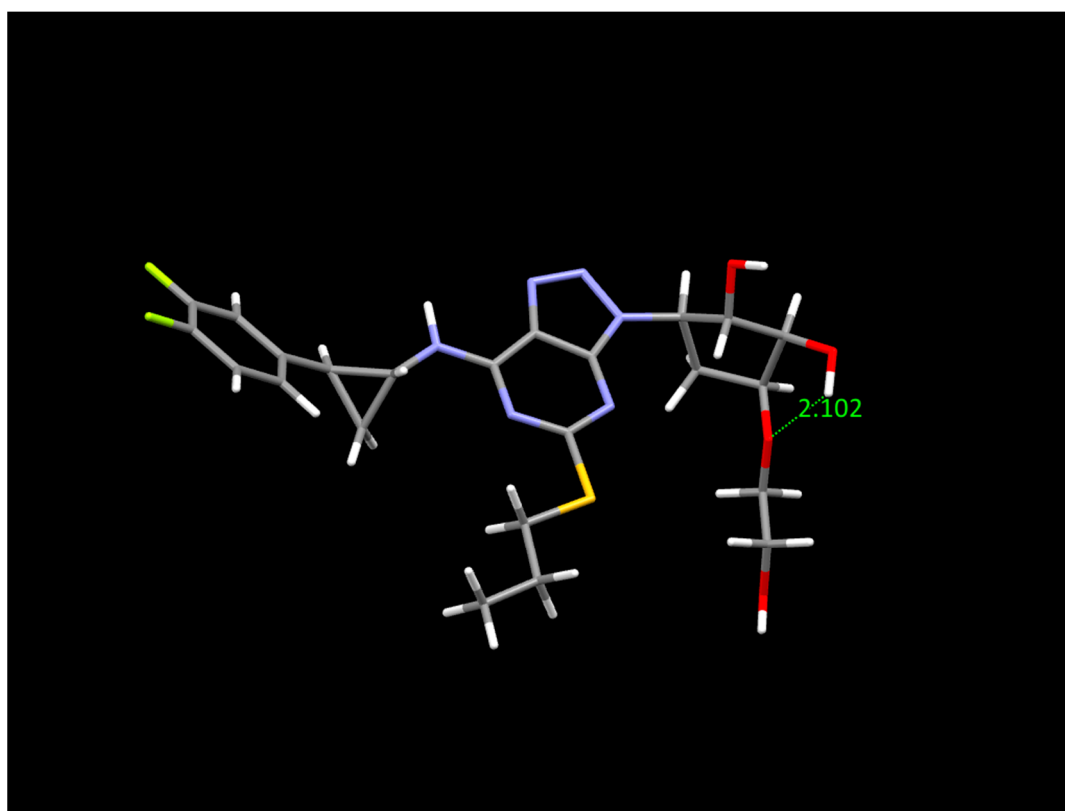

Overall shape of the ticagrelor computed at the Becke3LYP/6-311++G(d,p) level of theory (bond lengths are in Angstroms).

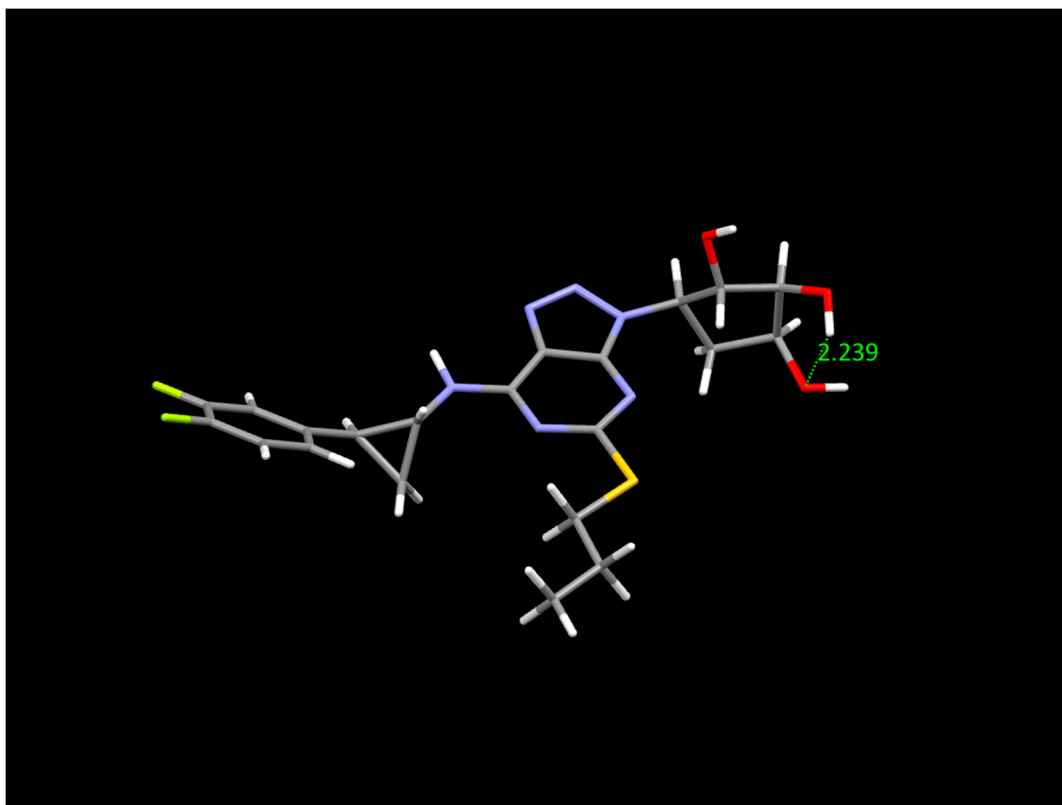

Overall shape of the ticagrelor metabolite computed at the Becke3LYP/6-311++G(d,p) level of theory (bond lengths are in Angstroms).

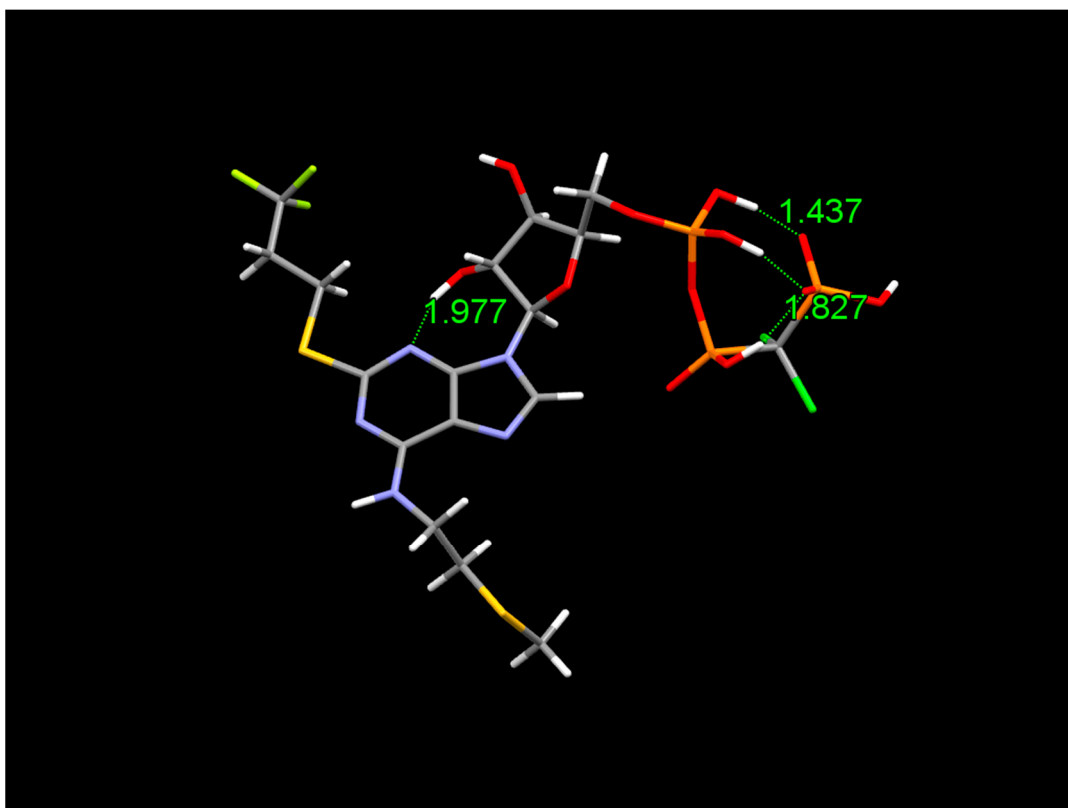

Overall shape of the cangrelor computed at the Becke3LYP/6-311++G(d,p) level of theory (bond lengths are in Angstroms).

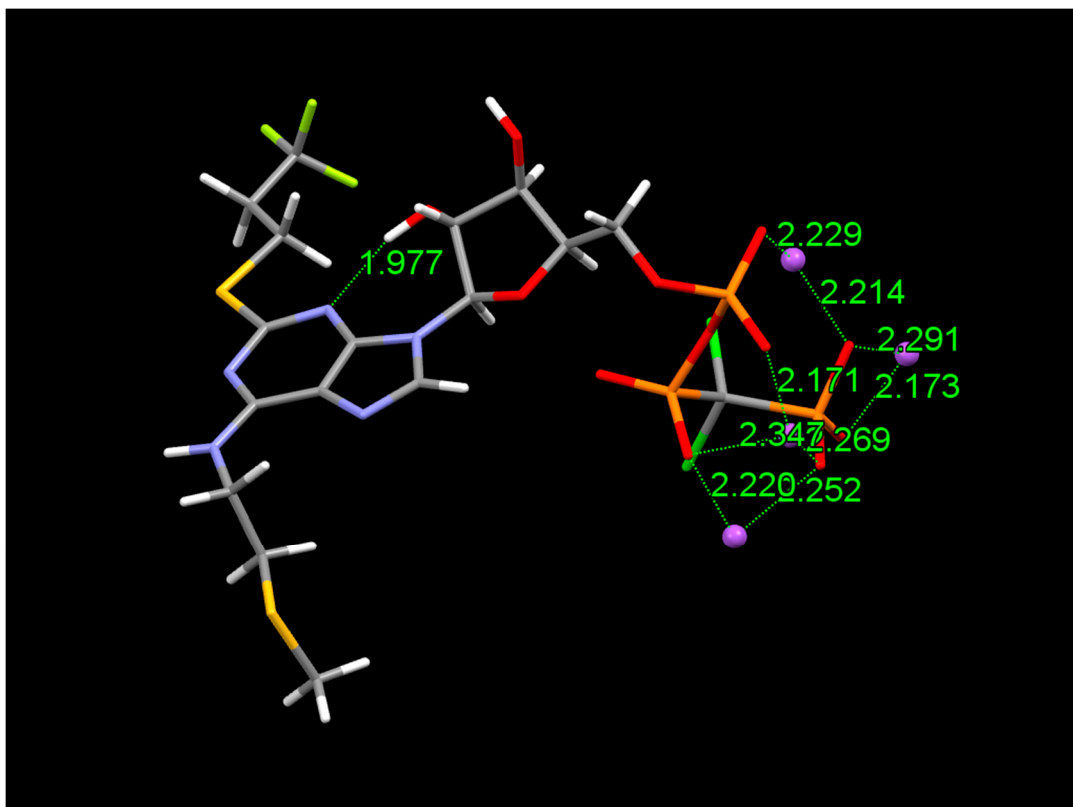

Overall shape of the cangrelor tetrasodium computed at the Becke3LYP/6-311++G(d,p) level of theory (bond lengths are in Angstroms).

**Figure S1.** The geometries of the drugs studied. Molecule figures were generated using Mercury software (<http://www.ccdc.cam.ac.uk/mercury/>).
